# Supplementary material for: Intra-specific variability and biological relevance of P3N-PIPO protein length in potyviruses
Source: PubMed Central journal article supplement (PMC3840659; doi:10.1186/1471-2148-13-249), 2013-11-13
Supplement: 1471-2148-13-249-S1.pdf [file 1471-2148-13-249-S1.pdf]

**Table S1.** Potyviruses analyzed in the present study. For each virus, the GenBank accession number of the reference sequence and its estimated PIPO size is given. The last two columns indicate the number of available isolates for each virus and the observed alternative stop codons, if present. The number of isolates showing a given stop codon is indicated in parentheses.

| <b>GenBank accession</b> | <b>Virus</b>                              | <b>Size</b> | <b># Isolates</b> | <b>Stop codons</b>                                         |
|--------------------------|-------------------------------------------|-------------|-------------------|------------------------------------------------------------|
| NC_000947                | <i>Japanese yam mosaic virus</i>          | 60          | 1                 | 61                                                         |
| NC_001445                | <i>Plum pox virus</i>                     | 99          | 69                | 100 (1), 103 (59), 106 (68)                                |
| NC_001517                | <i>Pepper mottle virus</i>                | 75          | 18                | 76                                                         |
| NC_001555                | <i>Tobacco etch virus</i>                 | 99          | 3                 | 100                                                        |
| NC_001616                | <i>Potato virus Y</i>                     | 75          | 80                | 62 (1), 65 (1), 73 (21), 74 (1), 76 (58), 77 (79), 93 (81) |
| NC_001671                | <i>Pea seed-borne mosaic virus</i>        | 79          | 3                 | 80 (3), 169 (1)                                            |
| NC_001768                | <i>Tobacco vein mottling virus</i>        | 91          | 2                 | 92                                                         |
| NC_001785                | <i>Papaya ringspot virus</i>              | 72          | 9                 | 69 (1), 73 (8), 80 (4)                                     |
| NC_001841                | <i>Sweet potato feathery mottle virus</i> | 67          | 3                 | 68                                                         |
| NC_002509                | <i>Turnip mosaic virus</i>                | 60          | 101               | 61 (87), 70 (87)                                           |
| NC_002600                | <i>Peanut mottle virus</i>                | 75          | 1                 | 76                                                         |
| NC_002634                | <i>Soybean mosaic virus</i>               | 75          | 64                | 76                                                         |
| NC_003606                | <i>Johnsongrass mosaic virus</i>          | 91          | 1                 | 92                                                         |
| NC_003224                | <i>Zucchini yellow mosaic virus</i>       | 76          | 12                | 76 (1), 77 (12)                                            |
| NC_003377                | <i>Maize dwarf mosaic virus</i>           | 80          | 4                 | 81                                                         |
| NC_003397                | <i>Bean common mosaic virus</i>           | 75          | 5                 | 76                                                         |
| NC_003398                | <i>Sugarcane mosaic virus</i>             | 80          | 13                | 81 (10), 82 (8)                                            |
| NC_003399                | <i>Scallion mosaic virus</i>              | 73          | 1                 | 74                                                         |
| NC_003492                | <i>Bean yellow mosaic virus</i>           | 79          | 10                | 80                                                         |
| NC_003536                | <i>Clover yellow vein virus</i>           | 60          | 1                 | 61                                                         |
| NC_003537                | <i>Dasheen mosaic virus</i>               | 94          | 1                 | 95                                                         |
| NC_003605                | <i>Lettuce mosaic virus</i>               | 75          | 5                 | 76                                                         |
| NC_003742                | <i>Cocksfoot streak virus</i>             | 83          | 2                 | 84                                                         |

|           |                                            |     |    |                |
|-----------|--------------------------------------------|-----|----|----------------|
| NC_004010 | <i>Potato virus V</i>                      | 69  | 1  | 70             |
| NC_004011 | <i>Leek yellow stripe virus</i>            | 74  | 4  | 75             |
| NC_004013 | <i>Cowpea aphid-borne mosaic virus</i>     | 73  | 3  | 74             |
| NC_004035 | <i>Sorghum mosaic virus</i>                | 80  | 3  | 81             |
| NC_004039 | <i>Potato virus A</i>                      | 83  | 7  | 84 (6), 95 (7) |
| NC_004047 | <i>Bean common mosaic necrosis virus</i>   | 73  | 6  | 74             |
| NC_004426 | <i>Wild potato mosaic virus</i>            | 69  | 1  | 70             |
| NC_004573 | <i>Peru tomato mosaic virus</i>            | 71  | 4  | 72             |
| NC_004752 | <i>Yam mosaic virus</i>                    | 61  | 1  | 62             |
| NC_005028 | <i>Papaya leaf-distortion mosaic virus</i> | 75  | 2  | 76             |
| NC_005029 | <i>Onion yellow dwarf virus</i>            | 75  | 5  | 76             |
| NC_005288 | <i>Lily mottle virus</i>                   | 62  | 3  | 63             |
| NC_005304 | <i>Beet mosaic virus</i>                   | 115 | 3  | 116            |
| NC_005778 | <i>Chilli veinal mottle virus</i>          | 72  | 6  | 73             |
| NC_006262 | <i>Watermelon mosaic virus</i>             | 75  | 28 | 76             |
| NC_007147 | <i>Pennisetum mosaic virus</i>             | 81  | 2  | 82             |
| NC_007180 | <i>Thunberg fritillary virus</i>           | 80  | 2  | 81             |
| NC_007216 | <i>Wisteria vein mosaic virus</i>          | 75  | 1  | 76             |
| NC_007433 | <i>Shallot yellow stripe virus</i>         | 79  | 2  | 80             |
| NC_007728 | <i>East Asian Passiflora virus</i>         | 75  | 2  | 76             |
| NC_007913 | <i>Konjac mosaic virus</i>                 | 81  | 1  | 82             |
| NC_008028 | <i>Daphne mosaic virus</i>                 | 72  | 2  | 73             |
| NC_008393 | <i>Pepper severe mosaic virus</i>          | 74  | 1  | 75             |
| NC_008558 | <i>Blackberry virus Y</i>                  | 110 | 1  | 111            |
| NC_008824 | <i>Narcissus degeneration virus</i>        | 76  | 1  | 77             |

**Table S2.** Available information for isolates belonging to *Plum pox virus*. The last three columns indicate the presence (+) or absence (-) of the alternative stop codons in each isolate.

| <b>GenBank accession</b> | <b>Host</b> | <b>Continent</b> | <b>Strain</b> | <b>100</b> | <b>103</b> | <b>106</b> |
|--------------------------|-------------|------------------|---------------|------------|------------|------------|
| HQ840523                 | cherry      | Europe           | C             | -          | -          | +          |
| HQ840522                 | cherry      | Europe           | C             | -          | -          | +          |
| HQ840521                 | cherry      | Europe           | C             | -          | -          | +          |
| AY912055                 | plum        | America          |               | -          | -          | +          |
| EU734794                 | apricot     | Asia             |               | -          | -          | +          |
| AY677114                 | apricot     | Asia             |               | -          | -          | +          |
| FM955843                 |             | Europe           | M             | -          | -          | +          |
| HQ840517                 | cherry      | Europe           | C             | -          | -          | +          |
| Y09851                   | cherry      | Europe           | C             | -          | -          | +          |
| AB576080                 | apricot     | Asia             | D             | -          | +          | +          |
| AB576079                 | apricot     | Asia             | D             | -          | +          | +          |
| AB576078                 | apricot     | Asia             | D             | -          | +          | +          |
| AB576077                 | apricot     | Asia             | D             | -          | +          | +          |
| AB576076                 | apricot     | Asia             | D             | -          | +          | +          |
| AB576075                 | apricot     | Asia             | D             | -          | +          | +          |
| AB576074                 | apricot     | Asia             | D             | -          | +          | +          |
| AB576073                 | apricot     | Asia             | D             | -          | +          | +          |
| AB576072                 | apricot     | Asia             | D             | -          | +          | +          |
| AB576071                 | apricot     | Asia             | D             | -          | +          | +          |
| AB576070                 | apricot     | Asia             | D             | -          | +          | +          |
| AB576069                 | apricot     | Asia             | D             | -          | +          | +          |
| AB576068                 | apricot     | Asia             | D             | -          | +          | +          |
| AB576067                 | apricot     | Asia             | D             | -          | +          | +          |
| AB576066                 | apricot     | Asia             | D             | -          | +          | +          |
| AB576065                 | apricot     | Asia             | D             | -          | +          | +          |

|          |         |         |   |   |   |   |
|----------|---------|---------|---|---|---|---|
| AB576064 | apricot | Asia    | D | - | + | + |
| AB576063 | apricot | Asia    | D | - | + | + |
| AB576062 | apricot | Asia    | D | - | + | + |
| AB576061 | apricot | Asia    | D | - | + | + |
| AB576060 | apricot | Asia    | D | - | + | + |
| AB576059 | apricot | Asia    | D | - | + | + |
| AB576058 | apricot | Asia    | D | - | + | + |
| AB576057 | apricot | Asia    | D | - | + | + |
| AB576056 | apricot | Asia    | D | - | + | + |
| AB576055 | apricot | Asia    | D | - | + | + |
| AB576054 | apricot | Asia    | D | - | + | + |
| AB576053 | apricot | Asia    | D | - | + | + |
| AB576052 | plum    | Asia    | D | - | + | + |
| AB576051 | apricot | Asia    | D | - | + | + |
| AB576050 | apricot | Asia    | D | - | + | + |
| AB576049 | apricot | Asia    | D | - | + | + |
| AB576048 | apricot | Asia    | D | - | + | + |
| AB576047 | apricot | Asia    | D | - | + | + |
| AB576046 | apricot | Asia    | D | - | + | + |
| AB576045 | apricot | Asia    | D | - | + | + |
| AB545926 | apricot | Asia    | D | - | + | + |
| EU117116 | plum    | Europe  |   | - | + | + |
| EF640939 | peach   | America |   | - | + | + |
| EF640938 | peach   | America |   | - | + | + |
| EF640937 | peach   | America |   | - | + | + |
| EF640936 | peach   | America | D | - | + | + |
| EF640935 | peach   | America | D | - | + | + |
| EF640934 | peach   | America | D | - | + | - |

|           |        |         |   |   |   |   |
|-----------|--------|---------|---|---|---|---|
| EF640933  | peach  | America | D | - | + | + |
| AM933761  | plum   | Europe  |   | - | + | + |
| DQ465243  | peach  | America | D | - | + | + |
| DQ465242  | peach  | America | D | - | + | + |
| AY953267  | peach  | America | D | - | + | + |
| AY953266  | plum   | America | D | - | + | + |
| AY953265  | almond | America | D | - | + | + |
| AY953264  | peach  | America | D | - | + | + |
| AY953263  | peach  | America | D | - | + | + |
| AY953262  | peach  | America | D | - | + | + |
| AY953261  | plum   | America | D | - | + | + |
| AY912058  | peach  | America | D | - | + | + |
| AY912057  | peach  | America | D | - | + | + |
| AY912056  | peach  | America | D | - | + | + |
| NC_001445 |        |         |   | + | - | + |
| X81083    | cherry |         | C | - | + | + |

1

**Table S3.** Available information for isolates belonging to *Potato virus Y*. The last seven columns indicate the presence (+) or absence (-) of the alternative stop codons in each isolate.

| <b>GenBank accession</b> | <b>Host</b> | <b>Continent</b> | <b>Strain</b> | <b>62</b> | <b>65</b> | <b>73</b> | <b>74</b> | <b>76</b> | <b>77</b> | <b>93</b> |
|--------------------------|-------------|------------------|---------------|-----------|-----------|-----------|-----------|-----------|-----------|-----------|
| FJ666337                 | potato      | Europe           | N             | -         | -         | -         | -         | +         | +         | +         |
| AB185833                 | potato      | Asia             | O             | -         | -         | -         | -         | +         | +         | +         |
| EF026076                 | potato      | America          | O             | -         | -         | -         | -         | +         | +         | +         |
| EF026075                 | potato      | America          | O             | -         | -         | -         | -         | +         | +         | +         |
| AY884985                 | potato      | America          | O             | -         | -         | -         | -         | +         | +         | +         |
| AY884982                 | potato      | America          | O             | -         | -         | -         | -         | +         | +         | +         |
| FJ643478                 | potato      | America          | O             | -         | -         | -         | -         | +         | +         | +         |
| FJ643477                 | potato      | America          | O             | -         | -         | -         | -         | +         | +         | +         |
| AB461453                 | potato      | Asia             | O             | -         | -         | -         | -         | +         | +         | +         |
| AB461452                 | potato      | Asia             | O             | -         | -         | -         | -         | +         | +         | +         |
| AB461451                 | potato      | Asia             | O             | -         | -         | -         | -         | +         | +         | +         |
| GQ200836                 | potato      | Asia             | O             | -         | -         | -         | -         | +         | +         | +         |
| DQ157179                 | potato      | America          | O             | -         | -         | -         | -         | +         | +         | +         |
| DQ157178                 | potato      | America          | O             | -         | -         | -         | -         | +         | +         | +         |
| DQ008213                 | potato      | America          | O             | -         | -         | -         | -         | +         | +         | +         |
| AY745492                 | potato      | America          | O             | -         | -         | -         | -         | +         | +         | +         |
| AY745491                 | potato      | America          | O             | -         | -         | -         | -         | +         | +         | +         |
| AF522296                 | potato      | Africa           | N             | -         | -         | -         | -         | +         | +         | +         |
| AF463399                 | tobacco     | America          | C             | -         | -         | -         | -         | +         | +         | +         |
| U09509                   | potato      | America          | O             | -         | -         | -         | -         | +         | +         | +         |
| M95491                   | potato      | Europe           | O             | -         | -         | -         | -         | +         | +         | +         |
| EU482153                 | tomato      | Europe           | C             | -         | -         | -         | -         | +         | +         | +         |
| FJ204166                 | potato      | America          | O             | -         | -         | -         | -         | +         | +         | +         |
| FJ204165                 | potato      | America          | O             | -         | -         | -         | -         | +         | +         | +         |

|           |         |         |   |   |   |   |   |   |   |   |
|-----------|---------|---------|---|---|---|---|---|---|---|---|
| NC_001616 |         | Europe  | N | - | - | - | - | + | + | + |
| EU182576  | tobacco | Asia    | N | - | - | - | - | + | + | + |
| D00441    |         | Europe  | N | - | - | - | - | + | + | + |
| EF558545  | potato  | Europe  | O | - | - | - | - | + | + | + |
| AJ890350  | potato  | Europe  | O | - | - | - | - | + | + | + |
| AJ890349  | potato  | Europe  | O | - | - | - | - | + | + | + |
| AJ890347  | potato  | Europe  | O | - | - | - | - | + | + | + |
| AJ890345  | potato  | Europe  | O | - | - | - | - | + | + | + |
| AJ890344  | potato  | Europe  | O | - | - | - | - | + | + | + |
| AJ890343  | tobacco | Europe  | O | - | - | - | - | + | + | + |
| AJ890342  | potato  | Europe  | O | - | - | - | - | + | + | + |
| AJ889868  | potato  | Europe  | O | - | - | - | - | + | + | + |
| AJ889867  | potato  | Europe  | O | - | - | - | - | + | + | + |
| AJ889866  | potato  | Europe  | O | - | - | - | - | + | + | + |
| EF016294  | potato  | Europe  | O | - | - | - | - | + | + | + |
| CS434577  |         |         | O | - | - | - | - | + | + | + |
| DQ309028  | tobacco | America | C | - | - | - | - | + | + | + |
| AJ585342  | potato  | Europe  | O | - | - | - | - | + | + | + |
| AJ585196  | potato  | Europe  | O | - | - | - | - | + | + | + |
| AJ585195  | potato  | Europe  | O | - | - | - | - | + | + | + |
| A08776    |         |         |   | - | - | - | - | + | + | + |
| AB461450  |         | Asia    | O | - | - | - | - | + | + | + |
| AB461454  |         | Asia    | O | - | - | - | - | + | + | + |
| HM367076  | potato  | America | O | - | - | - | - | + | + | + |
| HQ407482  | potato  | Asia    |   | - | - | - | - | + | + | + |
| HQ631374  | potato  | Asia    | N | - | - | - | - | + | + | + |
| JN034046  | potato  | Asia    |   | - | - | - | - | + | + | + |
| AY166867  | potato  | America | N | - | - | + | - | - | + | + |

|          |                     |         |   |   |   |   |   |   |   |   |
|----------|---------------------|---------|---|---|---|---|---|---|---|---|
| AB270705 | potato              | Asia    | N | - | - | + | - | + | + | + |
| AY166866 | potato              | America | N | - | - | + | - | - | + | + |
| EF026074 | potato              | America | O | - | - | + | - | + | + | + |
| AY884984 | potato              | America | N | - | - | + | - | - | + | + |
| AY884983 | potato              | America | N | - | - | + | - | - | + | + |
| FJ643479 | potato              | America | O | - | - | + | - | - | + | + |
| DQ157180 | potato              | America | N | - | - | + | - | - | - | + |
| AB331519 | potato              | Asia    | N | - | - | + | - | - | + | + |
| AB331518 | potato              | Asia    | N | - | - | + | - | + | + | + |
| AB331517 | potato              | Asia    | N | - | - | + | - | - | + | + |
| AB331516 | potato              | Asia    | N | - | - | + | - | - | + | + |
| AB331515 | potato              | Asia    | N | - | - | + | - | - | + | + |
| AM268435 | potato              | Oceania | N | - | - | + | - | - | + | + |
| AJ890346 | potato              | Europe  | O | - | - | + | - | + | + | + |
| X97895   | potato              | Europe  | N | - | - | + | - | - | + | + |
| AJ439544 | Black<br>nightshade | Europe  | C | - | - | + | - | - | + | + |
| AJ585198 | potato              | Europe  | O | - | - | + | - | - | + | + |
| AJ585197 | potato              | Europe  | N | - | - | + | - | - | + | + |
| HM367075 | potato              | America | O | - | - | + | - | + | + | + |
| AJ584851 | potato              | Europe  | N | + | - | - | - | + | + | + |
| AM113988 | potato              | Europe  | O | - | + | - | - | + | + | + |
| AJ890348 | potato              | Europe  | C | - | - | - | + | + | + | + |
| AJ439545 | wild tomato         | Europe  | C | - | - | - | - | - | + | + |
| EU563512 | potato              | Europe  | C | - | - | - | - | - | + | + |
| FJ214726 | ají                 | America |   | - | - | - | - | - | + | + |
| FJ204164 | potato              | America | O | - | - | - | - | - | + | + |
| AF237963 | pepper              | Europe  | C | - | - | - | - | - | - | + |

CS434575

N

-

-

+

-

-

+

+

1

**Table S4.** Available information for isolates belonging to *Turnip mosaic virus*. The last two columns indicate the presence (+) or absence (-) of the alternative stop codons in each isolate.

| <b>GenBank accession</b> | <b>Host</b>                  | <b>Continent</b> | <b>Strain</b> | <b>61</b> | <b>70</b> |
|--------------------------|------------------------------|------------------|---------------|-----------|-----------|
| AB093604                 | <i>Brassica napus</i>        | Europe           | B             | -         | +         |
| AB093606                 | <i>Armoracia rusticana</i>   | Europe           | B             | -         | +         |
| AB093607                 | <i>B. napus</i>              | Europe           | B             | -         | +         |
| AB093608                 | <i>Brassica oleracea</i>     | Europe           | B             | -         | +         |
| AB093610                 | <i>B. napus</i>              | America          | B             | -         | +         |
| AB093611                 | <i>B. oleracea</i>           | America          | B             | -         | +         |
| AB093612                 | <i>Brassica pekinensis</i>   | Oceania          | B             | -         | +         |
| AB252107                 | <i>Brassica rapa</i>         | Europe           | B             | -         | +         |
| AB252108                 | <i>B. napus</i>              | Europe           | B             | -         | +         |
| AY227024                 | <i>B. napus</i>              | America          |               | -         | +         |
| D10927                   | <i>B. napus</i>              | America          |               | -         | +         |
| DQ648591                 | <i>Cochlearia armoracia</i>  | Europe           |               | -         | +         |
| EF374098                 | <i>C. armoracia</i>          | Europe           |               | -         | +         |
| HQ637383                 |                              | Europe           |               | -         | +         |
| AB093596                 | <i>Limonium sinuatum</i>     | Europe           | B             | +         | +         |
| AB093600                 | <i>Raphanus sativus</i>      | Europe           | BR            | +         | +         |
| AB093605                 | <i>B. oleracea</i>           | Africa           | B             | +         | +         |
| AB093609                 | <i>B. oleracea</i>           | America          | B             | +         | +         |
| AB093613                 | <i>R. sativus</i>            | Asia             | BR            | +         | +         |
| AB093614                 | <i>Calendula officinalis</i> | Asia             | BR            | +         | +         |
| AB093617                 | <i>R. sativus</i>            | Asia             | BR            | +         | +         |
| AB093618                 | <i>R. sativus</i>            | Asia             | BR            | +         | +         |
| AB093619                 | <i>R. sativus</i>            | Asia             | BR            | +         | +         |
| AB093620                 | <i>R. sativus</i>            | Asia             | BR            | +         | +         |
| AB093621                 | <i>R. sativus</i>            | Asia             | BR            | +         | +         |

|          |                             |        |      |   |   |
|----------|-----------------------------|--------|------|---|---|
| AB093622 | <i>B. pekinensis</i>        | Asia   | BR   | + | + |
| AB093623 | <i>R. sativus</i>           | Asia   | BR   | + | + |
| AB093624 | <i>B. pekinensis</i>        | Asia   | BR   | + | + |
| AB093625 | <i>Brassica campestris</i>  | Asia   | B    | + | + |
| AB093626 | <i>Brassica spp.</i>        | Asia   | BR   | + | + |
| AB093627 | <i>R. sativus</i>           | Asia   | BR   | + | + |
| AB105134 | <i>B. oleracea</i>          | Asia   | B    | + | + |
| AB105135 | <i>R. sativus</i>           | Asia   | BR   | + | + |
| AB252094 | <i>R. sativus</i>           | Asia   | BR   | + | + |
| AB252095 | <i>R. sativus</i>           | Asia   | BR   | + | + |
| AB252096 | <i>R. sativus</i>           | Asia   | BR   | + | + |
| AB252097 | <i>R. sativus</i>           | Asia   | BR   | + | + |
| AB252098 | <i>R. sativus</i>           | Asia   | BR   | + | + |
| AB252099 | <i>R. sativus</i>           | Asia   | BR   | + | + |
| AB252100 | <i>R. sativus</i>           | Asia   | BR   | + | + |
| AB252101 | <i>B. pekinensis</i>        | Asia   | BR   | + | + |
| AB252102 | <i>Eustoma russellianum</i> | Asia   | BR   | + | + |
| AB252103 | <i>R. sativus</i>           | Asia   | BR   | + | + |
| AB252104 | <i>R. sativus</i>           | Asia   | BR   | + | + |
| AB252105 | <i>R. sativus</i>           | Asia   | BR   | + | + |
| AB252106 | <i>B. campestris</i>        | Asia   | B(R) | + | + |
| AB252109 | <i>R. sativus</i>           | Asia   | BR   | + | + |
| AB252110 | <i>R. sativus</i>           | Asia   | BR   | + | + |
| AB252111 | <i>B. pakinensis</i>        | Asia   | BR   | + | + |
| AB252112 | <i>B. oleracea</i>          | Europe | B    | + | + |
| AB252113 | <i>B. oleracea</i>          | Europe | B    | + | + |
| AB252114 | <i>B. oleracea</i>          | Europe | B    | + | + |
| AB252115 | <i>R. sativus</i>           | Asia   | BR   | + | + |

|          |                             |        |    |   |   |
|----------|-----------------------------|--------|----|---|---|
| AB252116 | <i>B. oleracea</i>          | Europe | B  | + | + |
| AB252118 | <i>R. sativus</i>           | Asia   | BR | + | + |
| AB252119 | <i>Brassica spp.</i>        | Asia   | B  | + | + |
| AB252120 | <i>R. sativus</i>           | Asia   | BR | + | + |
| AB252121 | <i>R. sativus</i>           | Asia   | BR | + | + |
| AB252123 | <i>R. sativus</i>           | Asia   | BR | + | + |
| AB252124 | <i>B. oleracea</i>          | Asia   | B  | + | + |
| AB252126 | <i>R. sativus</i>           | Asia   | BR | + | + |
| AB252127 | <i>R. sativus</i>           | Asia   | BR | + | + |
| AB252128 | <i>R. sativus</i>           | Asia   | BR | + | + |
| AB252129 | <i>R. sativus</i>           | Asia   | BR | + | + |
| AB252130 | <i>R. sativus</i>           | Asia   | BR | + | + |
| AB252131 | <i>R. sativus</i>           | Asia   | BR | + | + |
| AB252132 | <i>R. sativus</i>           | Asia   | BR | + | + |
| AB252133 | <i>B. oleracea</i>          | Europe | B  | + | + |
| AB252134 | <i>R. sativus</i>           | Asia   | BR | + | + |
| AB252135 | <i>Ranunculus asiaticus</i> | Europe | B  | + | + |
| AB252136 | <i>B. rapa</i>              | Asia   | BR | + | + |
| AB252137 | <i>R. sativus</i>           | Asia   | BR | + | + |
| AB252138 | <i>R. sativus</i>           | Asia   | BR | + | + |
| AB252139 | <i>R. sativus</i>           | Asia   | BR | + | + |
| AB252140 | <i>R. sativus</i>           | Asia   | BR | + | + |
| AB252141 | <i>Lactuca sativa</i>       | Asia   | BR | + | + |
| AB252143 | <i>R. sativus</i>           | Asia   | BR | + | + |
| AB362512 | <i>B. oleracea</i>          |        | B  | + | + |
| AB440238 | <i>Raphanus rugosum</i>     | Asia   |    | + | + |
| AB440239 | <i>Sisymbrium loeselii</i>  | Asia   |    | + | + |
| AF394601 |                             | Asia   |    | + | + |

|           |                             |        |     |   |   |
|-----------|-----------------------------|--------|-----|---|---|
| AF394602  |                             | Asia   |     | + | + |
| AY090660  |                             | Asia   | B   | + | + |
| DQ648592  | <i>C. armoracia</i>         | Europe |     | + | + |
| EU734434  |                             | Asia   |     | + | + |
| NC_002509 | <i>B. napus</i>             | Europe |     | + | + |
| AF530055  | <i>Zantedeschia spp.</i>    | Asia   | BR  | + | + |
| AB093597  | <i>Anemone coronaria</i>    | Europe | B   | + | - |
| AB093598  | <i>Alliaria officinalis</i> | Europe | (B) | + | - |
| AB093599  | <i>A. coronaria</i>         | Europe | (B) | + | - |
| AB093601  | <i>C. officinalis</i>       | Europe | BR  | + | - |
| AB093602  | <i>Allium ampeloprasum</i>  | Europe | B   | + | - |
| AB093603  | <i>L. sativa</i>            | Europe | BR  | + | - |
| AB093615  | <i>R. sativus</i>           | Asia   | BR  | + | - |
| AB093616  | <i>R. sativus</i>           | Asia   | BR  | + | - |
| AB252117  | <i>Allium spp.</i>          | Europe | B   | + | - |
| AB252122  | <i>Brassica spp.</i>        | Europe | B   | + | - |
| AB252125  | <i>B. rapa</i>              | Asia   | BR  | + | - |
| AB252142  | <i>R. sativus</i>           | Asia   | BR  | + | - |
| AB362513  | <i>R. sativus</i>           | Asia   | BR  | + | - |
| EU734433  |                             | Asia   |     | + | - |

1

1

**Table S5.** Available information for isolates belonging to *Sugarcane mosaic virus*. The last two columns indicate the presence (+) or absence (-) of the alternative stop codons in each isolate.

| <b>GenBank accession</b> | <b>Host</b> | <b>Continent</b> | <b>Strain</b> | <b>81</b> | <b>82</b> |
|--------------------------|-------------|------------------|---------------|-----------|-----------|
| JN021933                 | maize       | Asia             |               | +         | +         |
| AF494510                 |             | Asia             |               | +         | +         |
| EU091075                 | maize       | America          |               | +         | -         |
| AY569692                 | maize       | Asia             |               | +         | -         |
| GU474635                 | maize       | America          |               | +         | -         |
| AY149118                 | maize       | Asia             |               | +         | +         |
| NC_003398                | maize       | Asia             |               | +         | -         |
| AM110759                 | maize       | Europe           |               | +         | -         |
| AJ310105                 | maize       | Asia             |               | +         | +         |
| AJ278405                 |             | Oceania          | A             | -         | +         |
| AJ310104                 | sugarcane   | Asia             |               | -         | +         |
| AJ310103                 | sugarcane   | Asia             |               | -         | +         |
| AJ310102                 | sugarcane   | Asia             |               | -         | +         |

2

**Table S6.** Available information for isolates belonging to *Pea seed-borne mosaic virus*. The last two columns indicate the presence (+) or absence (-) of the alternative stop codons in each isolate.

| <b>GenBank accession</b> | <b>Host</b> | <b>Continent</b> | <b>Strain</b> | <b>80</b> | <b>169</b> |
|--------------------------|-------------|------------------|---------------|-----------|------------|
| X89997                   | pea         | America          | P-4           | -         | +          |
| NC_001671                | pea         | Europe           | DPD1          | +         | -          |
| AJ252242                 | lentil      | Europe           | P-2           | +         | -          |

1

**Table S7.** Available information for isolates belonging to *Papaya ringspot virus*. The last three columns indicate the presence (+) or absence (-) of the alternative stop codons in each isolate.

| <b>GenBank accession</b> | <b>Host</b> | <b>Continent</b> | <b>Strain</b> | <b>69</b> | <b>73</b> | <b>80</b> |
|--------------------------|-------------|------------------|---------------|-----------|-----------|-----------|
| HQ424465                 | papaya      | Asia             | P             | -         | +         | -         |
| AY162218                 | papaya      | Asia             | P             | -         | +         | -         |
| NC_001785                |             |                  |               | -         | +         | +         |
| EU882728                 | papaya      | Asia             | P             | -         | +         | -         |
| DQ374153                 | zucchini    | America          | W             | -         | +         | +         |
| EF017707                 | papaya      | Asia             | P             | -         | +         | +         |
| X96537                   | papaya      | Asia             | SM            | -         | +         | -         |
| AY010722                 | papaya      | Asia             | W             | +         | +         | -         |
| DQ374152                 | zucchini    | America          | W             | -         | -         | +         |

1

**Table S8.** Available information for isolates belonging to *Zucchini yellow mosaic virus*. Strain is not available for any of the isolates. The last two columns indicate the presence (+) or absence (-) of the alternative stop codons in each isolate.

| <b>GenBank accession</b> | <b>Host</b>  | <b>Continent</b> | <b>76</b> | <b>77</b> |
|--------------------------|--------------|------------------|-----------|-----------|
| AM422386                 | begonia      | Asia             | -         | +         |
| L29569                   | bitter gourd | Africa           | +         | -         |
| AY279000                 | pumpkin      | Asia             | -         | +         |
| AY278999                 | pumpkin      | Asia             | -         | +         |
| AY278998                 | pumpkin      | Asia             | -         | +         |
| NC_003224                | sponge gourd | Asia             | -         | +         |
| AB188116                 | cucumber     | Asia             | -         | +         |
| AB188115                 | cucumber     | Asia             | -         | +         |
| AJ316229                 | winter gourd | Asia             | -         | +         |
| AJ316228                 | sponge gourd | Asia             | -         | +         |
| AJ307036                 | cucumber     | Asia             | -         | +         |
| AJ515911                 | watermelon   | Asia             | -         | +         |

1

**Table S9.** Available information for isolates belonging to *Potato virus A*. The last two columns indicate the presence (+) or absence (-) of the alternative stop codons in each isolate.

| <b>GenBank accession</b> | <b>Host</b> | <b>Continent</b> | <b>Strain</b> | <b>84</b> | <b>95</b> |
|--------------------------|-------------|------------------|---------------|-----------|-----------|
| GU144321                 | potato      | Europe           | 2             | +         | +         |
| Z21670                   |             |                  |               | +         | +         |
| NC_004039                | potato      | Europe           | 3             | +         | +         |
| AJ131403                 | tamarillo   | Oceania          | 3             | -         | +         |
| AJ131402                 | potato      | America          | 1             | +         | +         |
| AJ131401                 | potato      | Europe           | 2             | +         | +         |
| AJ131400                 | potato      | Europe           | 1             | +         | +         |

1
